# Supplementary material for: Metal Complexes with Naphthalene-Based Acetic Acids as Ligands: Structure and Biological Activity
Source: MDPI journal article supplement (doi:10.3390/molecules28052171), 2023-02-26
Supplement: s1 [file s1]

## INDEX

| Content                                                                                                                                                                     | Page |
|-----------------------------------------------------------------------------------------------------------------------------------------------------------------------------|------|
| <b>Table S1.</b> Characteristic bands in the IR spectra of selected complexes.                                                                                              | 3    |
| <b>Table S2.</b> Anti-bacterial activity data (inhibition zone (IZ), in mm) of reported complexes for diverse concentrations                                                | 5    |
| <b>Table S3.</b> DPPH-scavenging activity (DPPH%, in %) of naproxen and its reported Cu(II), Co(II), Ni(II) and Mn(III) complexes for 20-min and 60-min incubation.         | 7    |
| <b>Table S4.</b> Hydroxyl radical scavenging activity (OH%, in %) of naproxen and its reported Cu(II), Co(II), Ni(II) and Mn(III) complexes.                                | 8    |
| <b>Table S5.</b> ABTS radical scavenging activity (ABTS%, in %) of naproxen and its Cu(II), Co(II), Ni(II) and Mn(III) reported complexes.                                  | 9    |
| <b>Table S6.</b> <i>In vitro</i> inhibition of soybean lipoxygenase (LOX) activity (IC <sub>50</sub> , in $\mu$ M) of naproxen and its reported Ni(II) and Ag(I) complexes. | 10   |
| <b>Table S7.</b> DNA-binding constants (K <sub>b</sub> ) for naproxen and its reported complexes.                                                                           | 11   |
| <b>Table S8.</b> BSA-quenching (k <sub>q</sub> ) and binding constants (K) for naproxen and its reported complexes.                                                         | 13   |
| <b>Table S9.</b> HSA-quenching (k <sub>q</sub> ) and binding constants (K) for naproxen and its reported complexes.                                                         | 14   |
| <b>References</b>                                                                                                                                                           | 15   |

**Table S1.** Characteristic bands in the IR spectra of selected complexes. The values of  $\nu_{\text{asym}}(\text{COO})$ ,  $\nu_{\text{sym}}(\text{COO})$  and  $\Delta\nu(\text{COO})$  (in  $\text{cm}^{-1}$ ) are cited as given in the relevant references.

| Complex                                                                     | $\nu_{\text{asym}}(\text{COO})$ | $\nu_{\text{sym}}(\text{COO})$ | $\Delta\nu(\text{COO})$ | Ref. |
|-----------------------------------------------------------------------------|---------------------------------|--------------------------------|-------------------------|------|
| I Monodentate binding                                                       |                                 |                                |                         |      |
| [Mn(NAP-O) <sub>2</sub> (py) <sub>2</sub> (H <sub>2</sub> O) <sub>2</sub> ] | 1601                            | 1388                           | 213                     | 1    |
| [Co(NAP-O) <sub>2</sub> (CH <sub>3</sub> OH) <sub>4</sub> ]                 | 1604                            | 1398                           | 206                     | 2    |
| [Co(NAP-O) <sub>2</sub> (py) <sub>2</sub> (H <sub>2</sub> O) <sub>2</sub> ] | 1605                            | 1389                           | 216                     | 2    |
| [Co(NAP-O) <sub>2</sub> (phen)(CH <sub>3</sub> OH) <sub>2</sub> ]           | 1609                            | 1398                           | 211                     | 2    |
| [Co(NAP-O) <sub>2</sub> (bipy)(CH <sub>3</sub> OH) <sub>2</sub> ]           | 1605                            | 1401                           | 204                     | 2    |
| [Ni(NAP-O) <sub>2</sub> (CH <sub>3</sub> OH) <sub>4</sub> ]                 | 1604                            | 1391                           | 213                     | 3    |
| [Ni(NAP-O) <sub>2</sub> (Hpko-N,N') <sub>2</sub> ]                          | 1604                            | 1392                           | 212                     | 3    |
| [Ni(NAP-O) <sub>2</sub> (py) <sub>2</sub> (H <sub>2</sub> O) <sub>2</sub> ] | 1604                            | 1390                           | 204                     | 3    |
| [Cu(NAP-O) <sub>2</sub> (bipy)]·H <sub>2</sub> O                            | 1600                            | 1379                           | 221                     | 4    |
| [Cu(NAP-O) <sub>2</sub> (phen)]·H <sub>2</sub> O                            | 1608                            | 1377                           | 231                     | 4    |
| [Cu(NAP-O) <sub>2</sub> (py) <sub>2</sub> (H <sub>2</sub> O)]               | 1595                            | 1389                           | 206                     | 4    |
| [Cu(NAP-O) <sub>2</sub> (H <sub>2</sub> O)(4pic) <sub>2</sub> ]             | 1591                            | 1380                           | 211                     | 5    |
| [Cu(N1A-O)(EDA) <sub>2</sub> ](ClO <sub>4</sub> )                           | 1598                            | 1381                           | 217                     | 6    |
| [Cu(NAP-O)(L1-6)Cl]                                                         | 1556-1564                       | 1370-1398                      | <200                    | 7    |
| [Zn(NAP-O) <sub>2</sub> (phen)]                                             |                                 |                                | 215                     | 8    |
| [Zn(NAP-O) <sub>2</sub> (neoc)]                                             |                                 |                                | 230                     | 8    |
| [Zn(NAP-O) <sub>2</sub> (2ampy) <sub>2</sub> ]                              |                                 |                                | 216                     | 8    |
| [Zn(NAP-O) <sub>2</sub> (Himi) <sub>2</sub> ]                               |                                 |                                | 196                     | 8    |
| [Zn(NAP-O) <sub>2</sub> (1,2-dmimid) <sub>2</sub> ]                         |                                 |                                | 229                     | 8    |
| [Ag(NAP-O)(PPh <sub>3</sub> ) <sub>3</sub> ]·H <sub>2</sub> O               | 1573                            | 1393                           | 180                     | 9    |
| II Bidentate chelating                                                      |                                 |                                |                         |      |
| [Ni(NAP-O,O') <sub>2</sub> (bipyam)]                                        | 1605                            | 1421                           | 184                     | 3    |
| [Ag(NAP-O,O')(tptp) <sub>2</sub> ]                                          | 1560                            | 1393                           | 167                     | 9    |
| [(n-Bu) <sub>2</sub> Sn(NAP-O,O') <sub>2</sub> ]                            | 1584                            | 1389                           | 195                     | 10   |
| III Monodentate binding + Bidentate chelating                               |                                 |                                |                         |      |
| [Mn(NAP-O)(NAP-O,O')(phen)(H <sub>2</sub> O)]                               | 1604                            | 1426, 1394                     | 178, 201                | 1    |
| [Ni(NAP-O)(NAP-O,O')(bipy)(CH <sub>3</sub> OH)]                             | 1606                            | 1420, 1401                     | 186, 205                | 3    |
| [Ni(NAP-O)(NAP-O,O')(phen)(H <sub>2</sub> O)]                               | 1606                            | 1422, 1400                     | 186, 206                | 3    |

| IV bridging                                                                                                                                       |      |      |     |    |
|---------------------------------------------------------------------------------------------------------------------------------------------------|------|------|-----|----|
| [Mn( $\mu$ -NAP-O,O') <sub>2</sub> (CH <sub>3</sub> OH)] <sub>n</sub>                                                                             | 1566 | 1393 | 173 | 11 |
| [Cu <sub>2</sub> ( $\mu$ -NAP-O,O') <sub>4</sub> (H <sub>2</sub> O) <sub>2</sub> ]                                                                | 1593 | 1424 | 169 | 4  |
| [Cu <sub>2</sub> ( $\mu$ -NAP-O,O') <sub>4</sub> (3pic) <sub>2</sub> ]                                                                            | 1604 | 1398 | 206 | 5  |
| [Mn <sub>6</sub> ( $\mu$ <sub>3</sub> -NAP-O,O,O')( $\mu$ <sub>2</sub> -Hsal-O,O')( $\mu$ <sub>2</sub> -shi-N,O) <sub>5</sub> (py) <sub>6</sub> ] | 1570 | 1390 | 180 | 11 |
| [Ru <sub>2</sub> ( $\mu$ <sub>2</sub> -N1A-O,O') <sub>4</sub> (THF) <sub>2</sub> ](PF <sub>6</sub> ).THF                                          | 1598 | 1411 | 187 | 12 |
| [Ru <sub>2</sub> ( $\mu$ <sub>2</sub> -N2A-O,O') <sub>4</sub> (H <sub>2</sub> O) <sub>2</sub> ](PF <sub>6</sub> ).THF                             | 1601 | 1409 | 192 | 12 |
| [Ag <sub>4</sub> ( $\mu$ -NAP-O,O') <sub>4</sub> (2pic) <sub>2</sub> ] <sub>n</sub>                                                               | 1531 | 1379 | 152 | 13 |
| [(Me <sub>3</sub> Sn) <sub>4</sub> ( $\mu$ <sub>2</sub> -NAP-O,O') <sub>4</sub> ]                                                                 | 1603 | 1388 | 215 | 14 |
| [(Bu <sub>3</sub> Sn) <sub>4</sub> ( $\mu$ <sub>2</sub> -NAP-O,O') <sub>4</sub> ]                                                                 | 1644 | 1439 | 205 | 14 |
| [(Ph <sub>3</sub> Sn)( $\mu$ <sub>2</sub> -NAP-O,O')] <sub>n</sub>                                                                                | 1632 | 1425 | 207 | 14 |
| [Y <sub>2</sub> ( $\mu$ <sub>2</sub> -N1A-O,O,O') <sub>2</sub> ( $\mu$ <sub>2</sub> -N1A-O,O') <sub>4</sub> (phen) <sub>2</sub> ].DMF             | 1563 | 1425 | 138 | 15 |
| [Pr <sub>2</sub> ( $\mu$ <sub>2</sub> -N1A-O,O,O') <sub>2</sub> ( $\mu$ <sub>2</sub> -N1A-O,O') <sub>4</sub> (phen) <sub>2</sub> ].DMF            | 1566 | 1380 | 186 | 15 |
| [Nd <sub>2</sub> ( $\mu$ <sub>2</sub> -N1A-O,O,O') <sub>2</sub> ( $\mu$ <sub>2</sub> -N1A-O,O') <sub>4</sub> (phen) <sub>2</sub> ]                | 1545 | 1401 | 144 | 16 |
| [Sm <sub>2</sub> ( $\mu$ <sub>2</sub> -N1A-O,O,O') <sub>2</sub> ( $\mu$ <sub>2</sub> -N1A-O,O') <sub>4</sub> (phen) <sub>2</sub> ].DMF            | 1545 | 1425 | 120 | 15 |
| [Eu <sub>2</sub> ( $\mu$ <sub>2</sub> -N1A-O,O,O') <sub>2</sub> ( $\mu$ <sub>2</sub> -N1A-O,O') <sub>4</sub> (phen) <sub>2</sub> ].DMF            | 1556 | 1422 | 134 | 15 |
| [Gd <sub>2</sub> ( $\mu$ <sub>2</sub> -N1A-O,O,O') <sub>2</sub> ( $\mu$ <sub>2</sub> -N1A-O,O') <sub>4</sub> (phen) <sub>2</sub> ].DMF            | 1563 | 1425 | 138 | 15 |
| [Tb <sub>2</sub> ( $\mu$ <sub>2</sub> -N1A-O,O,O') <sub>2</sub> ( $\mu$ <sub>2</sub> -N1A-O,O') <sub>4</sub> (phen) <sub>2</sub> ].DMF            | 1562 | 1422 | 140 | 15 |
| [Yb <sub>2</sub> ( $\mu$ <sub>2</sub> -N1A-O,O,O') <sub>2</sub> ( $\mu$ <sub>2</sub> -N1A-O,O') <sub>4</sub> (phen) <sub>2</sub> ].DMF            | 1578 | 1425 | 153 | 15 |

1,2-dmimid = 1,2-dimethylimidazole; 2pic = 2-picoline; 4pic = 4-picoline; bipy = 2,2'-bipyridine; bipyam = 2,2'-bipyridylamine; DMF = N,N-dimethylformamide; EDA = N,N-dimethylethane-1,2-diamine; Himi = imidazole; Hpko = di(2-pyridyl)ketone oxime; H<sub>2</sub>sal = salicylic acid; H<sub>3</sub>shi = salicylhydroxamic acid; neoc = neocuproine; phen = 1,10-phenanthroline; py = pyridine; THF = tetrahydrofuran; tptp = tri(p-tolyl)phosphine.

**Table S2.** Anti-bacterial activity data (inhibition zone (IZ), in mm) of reported complexes for diverse concentrations.

| <b>Compound</b>                                                      | <b>C</b> | <b>BS</b> | <b>ML</b> | <b>SA</b> | <b>EC</b> | <b>KP</b> | <b>PA</b> | <b>PM</b> | <b>Reference</b> |
|----------------------------------------------------------------------|----------|-----------|-----------|-----------|-----------|-----------|-----------|-----------|------------------|
| Naproxen                                                             | 8.5 mM   | NT        | NA        | NA        | NA        | NA        | NA        | NA        | 8                |
| [Zn <sub>2</sub> (NAP) <sub>4</sub> ]                                | 8.5 mM   | NT        | NA        | NA        | 10.0±1.0  | 10.0±1.0  | NA        | 8.0±0.6   | 8                |
| [Zn(NAP) <sub>2</sub> (phen)]                                        | 8.5 mM   | NT        | 16.0±2.1  | 16.0±1.1  | 20.0±2.1  | 20.0±2.5  | 19.0±1.1  | 21.0±1.0  | 8                |
| [Zn(NAP) <sub>2</sub> (neoc)]                                        | 8.5 mM   | NT        | 20.0±1.5  | 20.0±1.0  | 7.7±1.2   | 11.0±1.2  | NA        | NA        | 8                |
| [Zn(NAP) <sub>2</sub> (2ampy) <sub>2</sub> ]                         | 8.5 mM   | NT        | 12.3±1.2  | 12.3±0.6  | NA        | NA        | NA        | NA        | 8                |
| [Zn(NAP) <sub>2</sub> (Himi) <sub>2</sub> ]                          | 8.5 mM   | NT        | NA        | NA        | 9.7±0.6   | 9.7±0.6   | NA        | NA        | 8                |
| [Zn(NAP) <sub>2</sub> (1,2-dmimid) <sub>2</sub> ]                    | 8.5 mM   | NT        | 8.7±0.6   | 8.3±1.2   | NA        | NA        | NA        | NA        | 8                |
| Erythromycin                                                         | 8.5 mM   | NT        | 39.0      | 43.0      | 18.0      | 21.0      | NA        | 17.0      | 8                |
| Gentamycin                                                           | 8.5 mM   | NT        | 33.0      | 27.0      | 28.0      | 32.0      | 23.0      | 28.0      | 8                |
| HN1A                                                                 | 4 mg/mL  | 25        | NT        | 19.8      | 16.0      | NT        | NT        | NT        | 17               |
|                                                                      | 1.04 mM  | 8.0-10.0  | NT        | 8.2-9.2   | 7.0-12.0  | NT        | NT        | NT        | 15, 18           |
|                                                                      | 2.60 mM  | 11.0      | NT        | 10.0      | 14.0      | NT        | NT        | NT        | 15, 18           |
|                                                                      | 4.16 mM  | 10.8-14.0 | NT        | 10.8-15.0 | 16.0-18.0 | NT        | NT        | NT        | 15, 18           |
| [Co(N1A) <sub>2</sub> (H <sub>2</sub> O) <sub>2</sub> ] <sub>n</sub> | 4 mg/mL  | 23.3      | NT        | 15.5      | 21.5      | NT        | NT        | NT        | 17               |
| [Gd <sub>2</sub> (N1A) <sub>6</sub> (phen) <sub>2</sub> ]            | 1.04 mM  | 16.0      | NT        | 11.5      | 11.0      | NT        | NT        | NT        | 18               |
|                                                                      | 2.60 mM  | 17.5      | NT        | 18.0      | 16.2      | NT        | NT        | NT        | 18               |
|                                                                      | 4.16 mM  | 19.0      | NT        | 19.0      | 19.0      | NT        | NT        | NT        | 18               |
| [Tb <sub>2</sub> (N1A) <sub>6</sub> (phen) <sub>2</sub> ].DMF        | 1.04 mM  | 17.1      | NT        | 15.5      | 14.3      | NT        | NT        | NT        | 18               |
|                                                                      | 2.60 mM  | 20.8      | NT        | 27.5      | 24.0      | NT        | NT        | NT        | 18               |
|                                                                      | 4.16 mM  | 22.5      | NT        | 26.4      | 22.8      | NT        | NT        | NT        | 18               |
| [Y <sub>2</sub> (N1A) <sub>6</sub> (phen) <sub>2</sub> ].2DMF        | 1.04 mM  | 9.0       | NT        | 9.2       | 17.0      | NT        | NT        | NT        | 15               |
|                                                                      | 2.60 mM  | 15.0      | NT        | 19.1      | 18.1      | NT        | NT        | NT        | 15               |
|                                                                      | 4.16 mM  | 16.3      | NT        | 18.2      | 16.5      | NT        | NT        | NT        | 15               |

|                                                                |            |      |    |      |      |    |    |    |    |
|----------------------------------------------------------------|------------|------|----|------|------|----|----|----|----|
| [Eu <sub>2</sub> (N1A) <sub>6</sub> (phen) <sub>2</sub> ].2DMF | 1.04 mM    | 11.0 | NT | 10.2 | 13.1 | NT | NT | NT | 15 |
|                                                                | 2.60 mM    | 12.0 | NT | 16.1 | 15.0 | NT | NT | NT | 15 |
|                                                                | 4.16 mM    | 12.0 | NT | 14.5 | 15.0 | NT | NT | NT | 15 |
| [Sm <sub>2</sub> (N1A) <sub>6</sub> (phen) <sub>2</sub> ].2DMF | 1.04 mM    | 14.1 | NT | 16.0 | 14.0 | NT | NT | NT | 15 |
|                                                                | 2.60 mM    | 15.0 | NT | 18.1 | 18.5 | NT | NT | NT | 15 |
|                                                                | 4.16 mM    | 18.9 | NT | 23.0 | 19.0 | NT | NT | NT | 15 |
| [Tb <sub>2</sub> (N1A) <sub>6</sub> (phen) <sub>2</sub> ].2DMF | 1.04 mM    | 15.1 | NT | 15.5 | 14.3 | NT | NT | NT | 15 |
|                                                                | 2.60 mM    | 20.8 | NT | 27.5 | 24.0 | NT | NT | NT | 15 |
|                                                                | 4.16 mM    | 22.5 | NT | 26.4 | 22.8 | NT | NT | NT | 15 |
| [Gd <sub>2</sub> (N1A) <sub>6</sub> (phen) <sub>2</sub> ].2DMF | 1.04 mM    | 9.2  | NT | 12.0 | 10.1 | NT | NT | NT | 15 |
|                                                                | 2.60 mM    | 14.0 | NT | 15.2 | 19.8 | NT | NT | NT | 15 |
|                                                                | 4.16 mM    | 16.1 | NT | 16.9 | 20.0 | NT | NT | NT | 15 |
| [Pr <sub>2</sub> (N1A) <sub>6</sub> (phen) <sub>2</sub> ].2DMF | 1.04 mM    | 13.0 | NT | 12.1 | 12.0 | NT | NT | NT | 15 |
|                                                                | 2.60 mM    | 15.4 | NT | 17.2 | 15.3 | NT | NT | NT | 15 |
|                                                                | 4.16 mM    | 18.2 | NT | 14.6 | 14.3 | NT | NT | NT | 15 |
| [Yb <sub>2</sub> (N1A) <sub>6</sub> (phen) <sub>2</sub> ]      | 1.04 mM    | 10.1 | NT | 16.1 | 15.0 | NT | NT | NT | 15 |
|                                                                | 2.60 mM    | 15.1 | NT | 20.0 | 21.0 | NT | NT | NT | 15 |
|                                                                | 4.16 mM    | 18.1 | NT | 20.9 | 19.2 | NT | NT | NT | 15 |
| [Cu <sub>2</sub> (N1A) <sub>4</sub> (Himi) <sub>4</sub> ]      | 0.01 mg/mL | 12.0 | NT | NT   | 13.0 | NT | NT | NT | 19 |
|                                                                | 0.05 mg/mL | 12.0 | NT | NT   | 15.0 | NT | NT | NT | 19 |
|                                                                | 0.10mg/mL  | 13.0 | NT | NT   | 10.5 | NT | NT | NT | 19 |
|                                                                | 0.50 mg/mL | 12.0 | NT | NT   | 14.5 | NT | NT | NT | 19 |
|                                                                | 1.00 mg/mL | 16.0 | NT | NT   | 15.0 | NT | NT | NT | 19 |

Abbreviations for bacteria: BS = *Bacillus subtilis*; EC = *Escherichia coli*; KP = *Klebsiella pneumoniae*; ML = *Micrococcus luteus*; PA = *Pseudomonas aeruginosa*; PM = *Proteus mirabilis*; SA = *Staphylococcus aureus*

NA = not active

NT = not tested

**Table S3.** DPPH-scavenging activity (DPPH%, in %) of naproxen and its reported Cu(II), Co(II), Ni(II) and Mn(III) complexes for 20-min and 60-min incubation. BHT and NDGA were the reference compounds used in the studies. Each experiment was performed at least in triplicate SD < ±10%.

| Compound                                                                  | Code <sup>a</sup> | DPPH%, 20 min | DPPH%, 60 min | Ref |
|---------------------------------------------------------------------------|-------------------|---------------|---------------|-----|
| Naproxen                                                                  | HNAP              | 8.03±0.32     | 8.43±0.20     | 2   |
| [Cu <sub>2</sub> (NAP) <sub>4</sub> (H <sub>2</sub> O) <sub>2</sub> ]     | Cu1               | not given     | 20.16±0.23    | 2   |
| [Cu(NAP) <sub>2</sub> (py) <sub>2</sub> (H <sub>2</sub> O)]               | Cu2               | not given     | 18.66±0.29    | 2   |
| [Cu(NAP) <sub>2</sub> (phen)]·H <sub>2</sub> O                            | Cu3               | not given     | 18.76±0.13    | 2   |
| [Cu(NAP) <sub>2</sub> (bipy)]·H <sub>2</sub> O                            | Cu4               | not given     | 19.48±0.12    | 2   |
| [Co(NAP) <sub>2</sub> (CH <sub>3</sub> OH) <sub>4</sub> ]                 | Co1               | not given     | 20.37±0.23    | 2   |
| [Co(NAP) <sub>2</sub> (py) <sub>2</sub> (H <sub>2</sub> O) <sub>2</sub> ] | Co2               | not given     | 18.90±0.22    | 2   |
| [Co(NAP) <sub>2</sub> (phen)(H <sub>2</sub> O) <sub>2</sub> ]             | Co3               | not given     | 42.42±0.13    | 2   |
| [Co(NAP) <sub>2</sub> (bipy)(H <sub>2</sub> O) <sub>2</sub> ]             | Co4               | not given     | 26.98±0.41    | 2   |
| [Ni(NAP) <sub>2</sub> (CH <sub>3</sub> OH) <sub>4</sub> ]                 | Ni1               | 16.47±0.48    | 16.53±0.41    | 3   |
| [Ni(NAP) <sub>2</sub> (bipy)(CH <sub>3</sub> OH)]                         | Ni2               | 12.51±0.45    | 13.61±0.23    | 3   |
| [Ni(NAP) <sub>2</sub> (phen)(H <sub>2</sub> O)]                           | Ni3               | 15.67±0.61    | 14.48±0.34    | 3   |
| [Ni(NAP) <sub>2</sub> (bipyam)]                                           | Ni4               | 8.56±0.81     | 10.21±0.63    | 3   |
| [Ni(NAP) <sub>2</sub> (Hpko) <sub>2</sub> ]                               | Ni5               | 12.28±0.34    | 13.45±0.46    | 3   |
| [Ni(NAP) <sub>2</sub> (py) <sub>2</sub> (H <sub>2</sub> O) <sub>2</sub> ] | Ni6               | 14.51±0.73    | 15.91±0.45    | 3   |
| [Mn(NAP) <sub>2</sub> (py) <sub>2</sub> (H <sub>2</sub> O) <sub>2</sub> ] | Mn1               | 13.58±0.76    | 16.76±0.34    | 1   |
| [Mn(NAP) <sub>2</sub> (phen)(H <sub>2</sub> O)]                           | Mn2               | 14.67±0.37    | 16.06±0.62    | 1   |
| BHT                                                                       | BHT               | 31.30±0.10    | 60.00±0.38    | 2   |
| NDGA                                                                      | NDGA              | 81.02±0.18    | 82.60±0.17    | 2   |

<sup>a</sup> Abbreviation of the compounds used in Figures 23 and 24.

BHT = butylated hydroxytoluene; bipy = 2,2'-bipyridine; bipyam = 2,2'-bipyridylamine; HNAP = naproxen; Hpko = di(2-pyridyl)ketone oxime; NDGA = nordihydroguaiaretic acid; phen = 1,10-phenanthroline; py = pyridine.

**Table S4.** Hydroxyl radical scavenging activity (OH%, in %) of naproxen and its reported Cu(II), Co(II), Ni(II) and Mn(III) complexes. Trolox was the reference compound used in the studies. Each experiment was performed at least in triplicate SD < ±10%.

| Compound                                                                  | Code <sup>a</sup> | OH%        | Ref |
|---------------------------------------------------------------------------|-------------------|------------|-----|
| Naproxen                                                                  | HNAP              | 89.55±0.44 | 2   |
| [Cu <sub>2</sub> (NAP) <sub>4</sub> (H <sub>2</sub> O) <sub>2</sub> ]     | Cu1               | 72.84±0.05 | 2   |
| [Cu(NAP) <sub>2</sub> (py) <sub>2</sub> (H <sub>2</sub> O)]               | Cu2               | 93.40±0.22 | 2   |
| [Cu(NAP) <sub>2</sub> (phen)]·H <sub>2</sub> O                            | Cu3               | 93.26±0.36 | 2   |
| [Cu(NAP) <sub>2</sub> (bipy)]·H <sub>2</sub> O                            | Cu4               | 80.11±0.17 | 2   |
| [Co(NAP) <sub>2</sub> (CH <sub>3</sub> OH) <sub>4</sub> ]                 | Co1               | 96.75±0.30 | 2   |
| [Co(NAP) <sub>2</sub> (py) <sub>2</sub> (H <sub>2</sub> O) <sub>2</sub> ] | Co2               | 84.98±0.35 | 2   |
| [Co(NAP) <sub>2</sub> (phen)(H <sub>2</sub> O) <sub>2</sub> ]             | Co3               | 92.46±0.22 | 2   |
| [Co(NAP) <sub>2</sub> (bipy)(H <sub>2</sub> O) <sub>2</sub> ]             | Co4               | 90.21±0.19 | 2   |
| [Ni(NAP) <sub>2</sub> (CH <sub>3</sub> OH) <sub>4</sub> ]                 | Ni1               | 96.53±0.32 | 3   |
| [Ni(NAP) <sub>2</sub> (bipy)(CH <sub>3</sub> OH)]                         | Ni2               | 90.65±0.82 | 3   |
| [Ni(NAP) <sub>2</sub> (phen)(H <sub>2</sub> O)]                           | Ni3               | 80.12±0.75 | 3   |
| [Ni(NAP) <sub>2</sub> (bipyam)]                                           | Ni4               | 76.39±0.20 | 3   |
| [Ni(NAP) <sub>2</sub> (Hpko) <sub>2</sub> ]                               | Ni5               | 92.69±0.22 | 3   |
| [Ni(NAP) <sub>2</sub> (py) <sub>2</sub> (H <sub>2</sub> O) <sub>2</sub> ] | Ni6               | 96.78±0.45 | 3   |
| [Mn(NAP) <sub>2</sub> (py) <sub>2</sub> (H <sub>2</sub> O) <sub>2</sub> ] | Mn1               | 98.31±0.67 | 1   |
| [Mn(NAP) <sub>2</sub> (phen)(H <sub>2</sub> O)]                           | Mn2               | 97.42±0.83 | 1   |
| Trolox                                                                    |                   | 82.80±0.13 | 2   |

<sup>a</sup> Abbreviation of the compounds used in Figure 25.

bipy = 2,2'-bipyridine; bipyam = 2,2'-bipyridylamine; HNAP = naproxen; Hpko = di(2-pyridyl)ketone oxime; phen = 1,10-phenanthroline; py = pyridine; trolox = 6-hydroxy-2,5,7,8-tetramethylchromane-2-carboxylic acid.

**Table S5.** ABTS radical scavenging activity (ABTS%, in %) of naproxen and its Cu(II), Co(II), Ni(II) and Mn(III) reported complexes. Trolox was the reference compound used in the studies. Each experiment was performed at least in triplicate SD < ±10%.

| Compound                                                                  | Code <sup>a</sup> | ABTS%      | Ref |
|---------------------------------------------------------------------------|-------------------|------------|-----|
| Naproxen                                                                  | HNAP              | 87.51±0.17 | 2   |
| [Cu <sub>2</sub> (NAP) <sub>4</sub> (H <sub>2</sub> O) <sub>2</sub> ]     | Cu1               | 77.74±0.39 | 2   |
| [Cu(NAP) <sub>2</sub> (py) <sub>2</sub> (H <sub>2</sub> O)]               | Cu2               | 92.12±0.13 | 2   |
| [Cu(NAP) <sub>2</sub> (phen)]·H <sub>2</sub> O                            | Cu3               | 82.39±0.25 | 2   |
| [Cu(NAP) <sub>2</sub> (bipy)]·H <sub>2</sub> O                            | Cu4               | 76.44±0.20 | 2   |
| [Co(NAP) <sub>2</sub> (CH <sub>3</sub> OH) <sub>4</sub> ]                 | Co1               | 82.46±0.35 | 2   |
| [Co(NAP) <sub>2</sub> (py) <sub>2</sub> (H <sub>2</sub> O) <sub>2</sub> ] | Co2               | 90.22±0.28 | 2   |
| [Co(NAP) <sub>2</sub> (phen)(H <sub>2</sub> O) <sub>2</sub> ]             | Co3               | 87.32±0.17 | 2   |
| [Co(NAP) <sub>2</sub> (bipy)(H <sub>2</sub> O) <sub>2</sub> ]             | Co4               | 84.54±0.29 | 2   |
| [Ni(NAP) <sub>2</sub> (CH <sub>3</sub> OH) <sub>4</sub> ]                 | Ni1               | 96.03±0.43 | 3   |
| [Ni(NAP) <sub>2</sub> (bipy)(CH <sub>3</sub> OH)]                         | Ni2               | 88.82±0.60 | 3   |
| [Ni(NAP) <sub>2</sub> (phen)(H <sub>2</sub> O)]                           | Ni3               | 85.74±0.21 | 3   |
| [Ni(NAP) <sub>2</sub> (bipyam)]                                           | Ni4               | 84.59±0.92 | 3   |
| [Ni(NAP) <sub>2</sub> (Hpko) <sub>2</sub> ]                               | Ni5               | 97.73±0.27 | 3   |
| [Ni(NAP) <sub>2</sub> (py) <sub>2</sub> (H <sub>2</sub> O) <sub>2</sub> ] | Ni6               | 87.72±0.54 | 3   |
| [Mn(NAP) <sub>2</sub> (py) <sub>2</sub> (H <sub>2</sub> O) <sub>2</sub> ] | Mn1               | 94.78±0.36 | 1   |
| [Mn(NAP) <sub>2</sub> (phen)(H <sub>2</sub> O)]                           | Mn2               | 96.67±0.68 | 1   |
| Trolox                                                                    |                   | 91.8±0.17  | 2   |

<sup>a</sup> Abbreviation of the compounds used in Figure 26.

bipy = 2,2'-bipyridine; bipyam = 2,2'-bipyridylamine; HNAP = naproxen; Hpko = di(2-pyridyl)ketone oxime; phen = 1,10-phenanthroline; py = pyridine; trolox = 6-hydroxy-2,5,7,8-tetramethylchromane-2-carboxylic acid.



**Table S6.** *In vitro* inhibition of soybean lipoxygenase (LOX) activity (IC<sub>50</sub>, in  $\mu\text{M}$ ) of naproxen and its reported Ni(II) and Ag(I) complexes. Caffeic acid and cisplatin were the reference compounds used in the studies. Each experiment was performed at least in triplicate SD <  $\pm 10\%$ .

| Compound                                                                  | Code <sup>a</sup> | LOX, IC <sub>50</sub> ( $\mu\text{M}$ ) | Reference |
|---------------------------------------------------------------------------|-------------------|-----------------------------------------|-----------|
| Naproxen                                                                  | HNAP              | 56.61 $\pm$ 0.71                        | 3         |
| [Ni(NAP) <sub>2</sub> (CH <sub>3</sub> OH) <sub>4</sub> ]                 | Ni1               | 22.62 $\pm$ 0.41                        | 3         |
| [Ni(NAP) <sub>2</sub> (bipy)(CH <sub>3</sub> OH)]                         | Ni2               | 48.56 $\pm$ 0.08                        | 3         |
| [Ni(NAP) <sub>2</sub> (phen)(H <sub>2</sub> O)]                           | Ni3               | 45.77 $\pm$ 0.67                        | 3         |
| [Ni(NAP) <sub>2</sub> (bipyam)]                                           | Ni4               | 34.63 $\pm$ 0.78                        | 3         |
| [Ni(NAP) <sub>2</sub> (Hpko) <sub>2</sub> ]                               | Ni5               | 34.67 $\pm$ 0.28                        | 3         |
| [Ni(NAP) <sub>2</sub> (py) <sub>2</sub> (H <sub>2</sub> O) <sub>2</sub> ] | Ni6               | 37.22 $\pm$ 0.23                        | 3         |
| [Ag(NAP)(PPh <sub>3</sub> ) <sub>3</sub> ](H <sub>2</sub> O)              | Ag1               | 5.1                                     | 9         |
| [Ag(NAP)(tptp) <sub>3</sub> ](H <sub>2</sub> O)                           | ---               | > 30                                    | 9         |
| Caffeic acid                                                              | CA                | 600 $\pm$ 0.3                           | 3         |
| Cisplatin                                                                 | cisPt             | 65.9                                    | 9         |

<sup>a</sup> Abbreviation of the compounds used in Figure 27.

bipy = 2,2'-bipyridine; bipyam = 2,2'-bipyridylamine; HNAP = naproxen; Hpko = di(2-pyridyl)ketone oxime; phen = 1,10-phenanthroline; py = pyridine; tptp = tri(p-tolyl)phosphine.

**Table S7.** DNA-binding constants ( $K_b$ ) for naproxen and its reported complexes.

| Compound                         | Code <sup>a</sup> | $K_b$ ( $M^{-1}$ )           | Reference |
|----------------------------------|-------------------|------------------------------|-----------|
| Naproxen                         | HNAP              | $2.67(\pm 0.22) \times 10^4$ | 4         |
| $[Cu_2(NAP)_4(H_2O)_2]$          | Cu1               | $2.27(\pm 0.51) \times 10^4$ | 4         |
| $[Cu(NAP)_2(bipy)]$              | Cu2               | $3.86(\pm 0.25) \times 10^4$ | 4         |
| $[Cu(NAP)_2(phen)]$              | Cu3               | $9.20(\pm 0.30) \times 10^3$ | 4         |
| $[Cu(NAP)_2(py)_2(H_2O)]$        | Cu4               | $8.97(\pm 0.50) \times 10^3$ | 4         |
| $[Cu(NAP)(L1)Cl]$                | Cu5               | $2.38(\pm 0.17) \times 10^5$ | 7         |
| $[Cu(NAP)(L2)Cl]$                | Cu6               | $2.24(\pm 0.25) \times 10^5$ | 7         |
| $[Cu(NAP)(L3)Cl]$                | Cu7               | $4.27(\pm 0.19) \times 10^5$ | 7         |
| $[Co(NAP)_2(CH_3OH)_4]$          | Co1               | $3.15(\pm 0.57) \times 10^4$ | 2         |
| $[Co(NAP)_2(py)_2(H_2O)_2]$      | Co2               | $2.29(\pm 0.45) \times 10^4$ | 2         |
| $[Co(NAP)_2(phen)(H_2O)_2]$      | Co3               | $2.76(\pm 0.63) \times 10^4$ | 2         |
| $[Co(NAP)_2(bipy)(H_2O)_2]$      | Co4               | $3.58(\pm 0.07) \times 10^4$ | 2         |
| $[Ni(NAP)_2(CH_3OH)_4]$          | Ni1               | $1.47(\pm 0.05) \times 10^5$ | 3         |
| $[Ni(NAP)_2(bipy)(CH_3OH)]$      | Ni2               | $5.96(\pm 0.10) \times 10^5$ | 3         |
| $[Ni(NAP)_2(phen)(H_2O)]$        | Ni3               | $1.54(\pm 0.12) \times 10^5$ | 3         |
| $[Ni(NAP)_2(bipyam)]$            | Ni4               | $2.91(\pm 0.31) \times 10^5$ | 3         |
| $[Ni(NAP)_2(Hpko)_2]$            | Ni5               | $8.01(\pm 0.27) \times 10^5$ | 3         |
| $[Ni(NAP)_2(py)_2(H_2O)_2]$      | Ni6               | $6.14(\pm 0.10) \times 10^5$ | 3         |
| $[Mn(NAP)_2(CH_3OH)]_n$          | Mn1               | $2.26(\pm 0.08) \times 10^5$ | 11        |
| $[Mn(NAP)_2(phen)(H_2O)]$        | Mn2               | $6.40(\pm 0.17) \times 10^6$ | 1         |
| $[Mn(NAP)_2(py)(H_2O)_2]$        | Mn3               | $2.29(\pm 0.13) \times 10^4$ | 1         |
| $[Mn_6(NAP)(Hsal)(shi)_6(py)_6]$ | Mn4               | $3.07(\pm 0.12) \times 10^4$ | 11        |
| $[(n-Bu)_2Sn(NAP)_2]$            | Sn1               | $5.9(\pm 0.6) \times 10^4$   | 10        |
| $[Ag(NAP)(PPh_3)_3](H_2O)$       | Ag1               | $3.28(\pm 0.85) \times 10^5$ | 9         |
| $[Ag(NAP)(tptp)_2]$              | Ag2               | $4.7(\pm 1.8) \times 10^4$   | 9         |
| Ethidium bromide                 | EB                | $1.23(\pm 0.07) \times 10^5$ | 20        |

<sup>a</sup> Abbreviation of the compounds used in Figure 28.

bipy = 2,2'-bipyridine; bipyam = 2,2'-bipyridylamine; EB = ethidium bromide; H<sub>2</sub>sal = salicylic acid; H<sub>3</sub>shi = salicylhydroxamic acid; HNAP = naproxen; Hpko = di(2-pyridyl)ketone oxime; L1 = 4'-(4-tolyl)-2,2':6',2''-terpyridine; L2 = 4'-(furan-2-yl)-2,2':6',2''-terpyridine; L3 = 4'-(pyridin-3-yl)-2,2':6',2''-terpyridine; *n*-Bu = *n*-butyl; phen = 1,10-phenanthroline; PPh<sub>3</sub> = triphenylphosphine; py = pyridine; tptp = tri(*p*-tolyl)phosphine.

**Table S8.** BSA-quenching ( $k_q$ ) and binding constants ( $K$ ) for naproxen and its reported complexes.

| Compound                         | Code <sup>a</sup> | $k_{q(BSA)} (M^{-1} s^{-1})$    | $K_{(BSA)} (M^{-1})$                  | Ref |
|----------------------------------|-------------------|---------------------------------|---------------------------------------|-----|
| Naproxen                         | HNAP              | $1.18(\pm 0.06) \times 10^{12}$ | $5.35 \times 10^3$                    | 4   |
| $[Cu_2(NAP)_4(H_2O)_2]$          | Cu1               | $2.34(\pm 0.15) \times 10^{12}$ | $6.61 \times 10^4$                    | 4   |
| $[Cu(NAP)_2(bipy)]$              | Cu2               | $2.24(\pm 0.14) \times 10^{12}$ | $1.20 \times 10^4$                    | 4   |
| $[Cu(NAP)_2(phen)]$              | Cu3               | $2.94(\pm 0.09) \times 10^{12}$ | $1.90 \times 10^4$                    | 4   |
| $[Cu(NAP)_2(py)_2(H_2O)]$        | Cu4               | $2.33(\pm 0.14) \times 10^{12}$ | $2.55 \times 10^4$                    | 4   |
| $[Co(NAP)_2(CH_3OH)_4]$          | Co1               | $2.47(\pm 0.16) \times 10^{12}$ | $1.25 \times 10^5$                    | 2   |
| $[Co(NAP)_2(py)_2(H_2O)_2]$      | Co2               | $1.21(\pm 0.04) \times 10^{12}$ | $2.64 \times 10^4$                    | 2   |
| $[Co(NAP)_2(phen)(H_2O)_2]$      | Co3               | $2.09(\pm 0.15) \times 10^{12}$ | $1.07 \times 10^5$                    | 2   |
| $[Co(NAP)_2(bipy)(H_2O)_2]$      | Co4               | $1.75(\pm 0.09) \times 10^{12}$ | $3.06 \times 10^4$                    | 2   |
| $[Ni(NAP)_2(CH_3OH)_4]$          | Ni1               | $2.46(\pm 0.12) \times 10^{12}$ | $4.51(\pm 0.34) \times 10^4$          | 3   |
| $[Ni(NAP)_2(bipy)(CH_3OH)]$      | Ni2               | $2.42(\pm 0.24) \times 10^{12}$ | $3.25(\pm 0.31) \times 10^5$          | 3   |
| $[Ni(NAP)_2(phen)(H_2O)]$        | Ni3               | $5.90(\pm 0.32) \times 10^{12}$ | $4.18(\pm 0.34) \times 10^5$          | 3   |
| $[Ni(NAP)_2(bipyam)]$            | Ni4               | $8.28(\pm 0.22) \times 10^{12}$ | $4.59(\pm 0.35) \times 10^4$          | 3   |
| $[Ni(NAP)_2(Hpko)_2]$            | Ni5               | $4.50(\pm 0.28) \times 10^{12}$ | $1.08(\pm 0.07) \times 10^5$          | 3   |
| $[Ni(NAP)_2(py)_2(H_2O)_2]$      | Ni6               | $9.52(\pm 0.43) \times 10^{11}$ | $7.44(\pm 0.55) \times 10^3$          | 3   |
| $[Mn(NAP)_2(py)_2(H_2O)_2]$      | Mn1               | $1.35(\pm 0.10) \times 10^{12}$ | $9.99(\pm 0.45) \times 10^5$          | 1   |
| $[Mn(NAP)_2(phen)(H_2O)]$        | Mn2               | $2.39(\pm 0.07) \times 10^{12}$ | $1.61(\pm 0.25) \times 10^4$          | 1   |
| $[Mn(NAP)_2(CH_3OH)]_n$          | Mn3               | $2.05(\pm 0.05) \times 10^{12}$ | $3.51(\pm 0.12) \times 10^4$          | 11  |
| $[Mn_6(NAP)(Hsal)(shi)_6(py)_6]$ | Mn4               | $1.06(\pm 0.03) \times 10^{12}$ | $1.03(\pm 0.04) \times 10^5$          | 11  |
| $[Nd_2(N1A)_6(phen)_2]$          | -                 | not reported                    | $2.41 \times 10^4 - 3.03 \times 10^4$ | 16  |

<sup>a</sup> Abbreviation of the compounds used in Figures 29 and 30.

**Table S9.** HSA-quenching ( $k_q$ ) and binding constants ( $K$ ) for naproxen and its reported complexes.

| Compound                                                       | Code <sup>a</sup> | $k_{q(\text{HSA})}$ ( $\text{M}^{-1} \text{s}^{-1}$ ) | $K_{(\text{HSA})}$ ( $\text{M}^{-1}$ ) | Ref |
|----------------------------------------------------------------|-------------------|-------------------------------------------------------|----------------------------------------|-----|
| Naproxen                                                       | HNAP              | $1.24(\pm 0.09) \times 10^{12}$                       | $3.27 \times 10^4$                     | 4   |
| $[\text{Cu}_2(\text{NAP})_4(\text{H}_2\text{O})_2]$            | Cu1               | $4.73(\pm 0.37) \times 10^{12}$                       | $7.83 \times 10^4$                     | 4   |
| $[\text{Cu}(\text{NAP})_2(\text{bipy})]$                       | Cu2               | $4.70 (\pm 0.17) \times 10^{12}$                      | $3.20 \times 10^4$                     | 4   |
| $[\text{Cu}(\text{NAP})_2(\text{phen})]$                       | Cu3               | $4.02(\pm 0.21) \times 10^{12}$                       | $7.69 \times 10^4$                     | 4   |
| $[\text{Cu}(\text{NAP})_2(\text{py})_2(\text{H}_2\text{O})]$   | Cu4               | $4.56(\pm 0.27) \times 10^{12}$                       | $9.55 \times 10^3$                     | 4   |
| $[\text{Co}(\text{NAP})_2(\text{CH}_3\text{OH})_4]$            | Co1               | $2.42(\pm 0.10) \times 10^{12}$                       | $3.20 \times 10^4$                     | 2   |
| $[\text{Co}(\text{NAP})_2(\text{py})_2(\text{H}_2\text{O})_2]$ | Co2               | $1.60(\pm 0.07) \times 10^{12}$                       | $2.69 \times 10^4$                     | 2   |
| $[\text{Co}(\text{NAP})_2(\text{phen})(\text{H}_2\text{O})_2]$ | Co3               | $4.23(\pm 0.27) \times 10^{12}$                       | $1.58 \times 10^4$                     | 2   |
| $[\text{Co}(\text{NAP})_2(\text{bipy})(\text{H}_2\text{O})_2]$ | Co4               | $6.28(\pm 0.36) \times 10^{12}$                       | $2.19 \times 10^4$                     | 2   |
| $[\text{Ni}(\text{NAP})_2(\text{CH}_3\text{OH})_4]$            | Ni1               | $6.57(\pm 0.37) \times 10^{12}$                       | $1.35(\pm 0.11) \times 10^4$           | 3   |
| $[\text{Ni}(\text{NAP})_2(\text{bipy})(\text{CH}_3\text{OH})]$ | Ni2               | $2.37(\pm 0.29) \times 10^{12}$                       | $1.93(\pm 0.03) \times 10^5$           | 3   |
| $[\text{Ni}(\text{NAP})_2(\text{phen})(\text{H}_2\text{O})]$   | Ni3               | $1.13(\pm 0.06) \times 10^{13}$                       | $2.73(\pm 0.25) \times 10^4$           | 3   |
| $[\text{Ni}(\text{NAP})_2(\text{bipyam})]$                     | Ni4               | $1.59(\pm 0.05) \times 10^{13}$                       | $1.88(\pm 0.26) \times 10^5$           | 3   |
| $[\text{Ni}(\text{NAP})_2(\text{Hpko})_2]$                     | Ni5               | $4.71(\pm 0.13) \times 10^{12}$                       | $3.02(\pm 0.41) \times 10^4$           | 3   |
| $[\text{Ni}(\text{NAP})_2(\text{py})_2(\text{H}_2\text{O})_2]$ | Ni6               | $1.61(\pm 0.08) \times 10^{13}$                       | $4.05(\pm 0.23) \times 10^4$           | 3   |
| $[\text{Mn}(\text{NAP})_2(\text{py})_2(\text{H}_2\text{O})_2]$ | Mn1               | $2.25(\pm 0.12) \times 10^{12}$                       | $6.50(\pm 0.30) \times 10^4$           | 1   |
| $[\text{Mn}(\text{NAP})_2(\text{phen})(\text{H}_2\text{O})]$   | Mn2               | $9.06(\pm 0.26) \times 10^{12}$                       | $3.30(\pm 0.28) \times 10^5$           | 1   |

<sup>a</sup> Abbreviation of the compounds used in Figures 29 and 30.

## References

- 1 Dimiza, F.; Raptopoulou, C.P.; Psycharis, V.; Papadopoulos, A.N.; Psomas, G. Manganese(II) complexes with the non-steroidal anti-inflammatory drugs naproxen and mefenamic acid. Synthesis, structure, antioxidant capacity, interaction with albumins and DNA. *New J. Chem.*, **2018**, 42, 16666–16681.
- 2 Dimiza, F.; Papadopoulos, A.N.; Tangoulis, V.; Psycharis, V.; Raptopoulou, C.P.; Kessissoglou, D.P. Psomas, G. Biological evaluation of cobalt(II) complexes with non-steroidal anti-inflammatory drug naproxen. *J. Inorg. Biochem.*, **2012**, 107, 54–64.
- 3 Totta, X.; Hatzidimitriou, A.G.; Papadopoulos, A.N.; Psomas, G. Nickel(II)-naproxen mixed-ligand complexes: Synthesis, structure, antioxidant activity and interaction with albumins and calf-thymus DNA. *New J. Chem.*, **2017**, 41, 4478–4492.
- 4 Dimiza, F.; Perdih, F.; Tangoulis, V.; Turel, I.; Kessissoglou, D.P.; Psomas, G. Interaction of copper(II) with the non-steroidal anti-inflammatory drugs naproxen and diclofenac: Synthesis, Structure, DNA- and albumin-binding. *J. Inorg. Biochem.*, **2011**, 105, 476–489.
- 5 Caglar, S.; Adiguzel, E.; Sariboga, B.; Temel, E.; Buyukgungor, O. Mono and dinuclear copper(II) naproxenato complexes containing 3-picoline and 4-picoline: synthesis, structure, properties, catechol oxidase, and antimicrobial activities. *J. Coord. Chem.*, **2014**, 67, 670–683.
- 6 Sheng, G.; Cheng, X.; You, Z.; Zhu, H. Syntheses, Crystal Structures, and Characterization of Copper(II) and Zinc(II) Complexes Derived from N,N-Dimethylethane-1,2-diamine and Phenylacetic Acid Derivatives. *Synth. React. Inorg., Metal-Org., Nano-Met. Chem.*, **2015**, 45, 1273–1277.
- 7 Mahendiran, D.; Gurumoorthy, P.; Gunasekaran, K.; Kumar, R.S.; Rahiman, A.K. Structural modeling, *in vitro* antiproliferative activity, and the effect of substituents on the DNA fastening and scission actions of heteroleptic copper(II) complexes with terpyridines and naproxen. *New J. Chem.*, **2015**, 39, 7895–7911.
- 8 Ali, H.A.; Fares, H.; Darawsheh, M.; Rappocciolo, E.; Akkawi, M.; Jaber, S. Synthesis, characterization and biological activity of new mixed ligand complexes of Zn(II) naproxen with nitrogen based ligands. *Eur. J. Med. Chem.*, **2015**, 89, 67–76.
- 9 Banti, C.N.; Giannoulis, A.D.; Kourkouvelis, N.; Owczarzak, A.M.; Kubicki, M.; Hadjikakou, S.K. Novel metallo-therapeutics of the NSAID naproxen. Interaction with intracellular components that leads the cells to apoptosis. *Dalton Trans.*, **2014**, 43, 6848–6863.
- 10 Banti, C.N.; Gkaniatsou, E.I.; Kourkouvelis, N.; Manos, M.J.; Tasiopoulos, A.J.; Bakas, T.; Hadjikakou, S.K. Assessment of organotin against the linoleic acid, glutathione and CT-DNA. *Inorg. Chim. Acta*, **2014**, 423, 98–106.

- 11 Tarushi, A.; Zampakou, M.; Perontsis, S.; Lafazanis, K.; Pantazaki, A.A.; Hatzidimitriou, A.G.; Geromichalos, G.D.; Psomas, G. Manganese(II) complexes of tolfenamic acid or naproxen in polymeric structures or encapsulated in [15-MC-5] manganese(III) metallacrowns: Structure and biological activity. *Inorg. Chim. Acta*, **2018**, 483, 579–592.
- 12 O'Rourke, N.F. Ronaldson, M. Cameron, T.S. Wang, R. Aquino, M.A.S. Equatorial  $\pi$ -stacking interactions in diruthenium (II,III) tetracarboxylate complexes containing extended  $\pi$ -systems. *J. Mol. Struct.*, **2013**, 1052, 17–23.
- 13 Caglar, S.; Altay, A.; Harurluoglu, B.; Yeniceri, E.K.K.; Caglar, B.; Sahin, O. Synthesis, structural characterization and evaluation of anticancer activity of polymeric silver(I) complexes based on niflumic acid/naproxen and picoline derivatives. *J. Coord. Chem.*, **2022**, 75, 178–196.
- 14 Ma, C.; Zhang, B.; Zhang, S.; Zhang, R. Chiral organotin (IV) carboxylates complexes: Syntheses, characterization, and crystal structures with chiral (S)-(+)-6-methoxy- $\alpha$ -methyl-2-naphthaleneaceto acid ligand. *J. Organomet. Chem.*, **2011**, 696, 2165–2171.
- 15 Liu, Y.; Rong, D.; Xia, H.; Wang, D.; Liu, Y. Luminescence Properties and Antibacterial Activity of  $[\text{Ln}_2(\text{NNA})_6(\text{Phen})_2] \cdot n\text{C}_3\text{H}_7\text{NO}$  ( $\text{Ln} = \text{Y, Eu, Gd, Pr, Sm, Tb, Yb}$ ,  $n = 0, 1, 2$ , NAA = 1-Naphthylacetic Acid, Phen = 1,10-Phenanthroline). *Synth. React. Inorg., Metal-Org., Nano-Met. Chem.*, **2008**, 38, 635–641.
- 16 Xia, H.; Liu, Y.; Lu, G.; Wang, D. Crystal Structure and Interaction With Bovine Serum Albumin of Rare Earth Complex  $[\text{Nd}(\alpha\text{-C}_{10}\text{H}_7\text{CH}_2\text{COO})_3(\text{C}_{12}\text{H}_8\text{N}_2)]_2$ . *Synth. React. Inorg., Metal-Org., Nano-Met. Chem.*, **2012**, 42, 145–153.
- 17 Liu, Y.; Xia, H.; An, X.; Zhou, L.; Wang, D. The Synthesis, Structure and Antimicrobial Study of Poly[diaqua bis(1-naphthylacetic acid)Cobalt(II) Complex  $[\text{Co}(\text{C}_{12}\text{H}_9\text{O}_2)_2(\text{H}_2\text{O})_2]_n$ . *Synth. React. Inorg., Metal-Org., Nano-Met. Chem.*, 2008, 38, 356–361.
- 18 Liu, Y.; Rong, D.; Xia, H.; Wang, D.; Chen, L. Synthesis, crystal structure, and luminescence properties of  $[\text{TbGd}(\text{NAA})_6(\text{phen})_2]$  and  $[\text{Tb}_2(\text{NNA})_6(\text{phen})_2] \cdot 2\text{C}_3\text{H}_7\text{NO}$ . *J. Coord. Chem.*, **2009**, 62, 1835–1845.
- 19 Zhao, G.; Yin, F.; Ge, H.; Li, S. Synthesis, Structure and Antibacterial Properties of Bis-Imidazole-bis(naphthalene-1-yl-acetato)copper(II), *Asian J. Chem.*, **2014**, 26, 2550–2552.
- 20 Dimitrakopoulou, A.; Dendrinou-Samara, C.; Pantazaki, A.A.; Alexiou, M.; Nordlander, E.; Kessissoglou, D.P. Synthesis, structure and interactions with DNA of novel tetranuclear,  $[\text{Mn}_4(\text{II/II/II/IV})]$  mixed valence complexes. *J. Inorg. Biochem.* **2008**, 102, 618–628.
